# Supplementary material for: Strain-driven topological quantum phase transition in (pseudo)cubic (mixed)-Cs/MA/FA halide perovskites
Source: Royal Society of Chemistry journal article supplement (doi:10.1039/d3tc03348a), 2024-01-01
Supplement: d3tc03348a1.pdf [file d3tc03348a1.pdf]

# **Strain-driven topological quantum phase transition in (pseudo)-cubic (mixed)-Cs/MA/FA halide perovskites<sup>†</sup>**

Ankita Phutela,<sup>\*</sup> Sajjan Sheoran, Deepika Gill, and Saswata Bhattacharya<sup>\*</sup>

*Department of Physics, Indian Institute of Technology Delhi, New Delhi, India*

E-mail: Ankita@physics.iitd.ac.in[AP]; saswata@physics.iitd.ac.in[SB]

Phone: +91-11-2659 1359. Fax: +91-11-2658 2037

## Supplementary Information

- I.** Relaxed structures of cubic and pseudocubic FAPbI<sub>3</sub> and partial density of states of FAPbI<sub>3</sub>.
- II.** Band profile of FAPbI<sub>3</sub> using PBE+SOC and G<sub>0</sub>W<sub>0</sub>@HSE06+SOC and band inversion using HSE06+SOC  $\epsilon_{xc}$  functionals.
- III.** Structural stability of cubic FAPbI<sub>3</sub>, pseudocubic FAPbI<sub>3</sub> and mixed cation perovskites viz. Cs<sub>0.5</sub>MA<sub>0.5</sub>PbI<sub>3</sub>, Cs<sub>0.75</sub>MA<sub>0.25</sub>PbI<sub>3</sub> and Cs<sub>0.25</sub>MA<sub>0.75</sub>PbI<sub>3</sub>.
- IV.** Tight-Binding Model.
- V.** TB bands fitted with DFT bands.
- VI.** Surface states of FAPbI<sub>3</sub> in a different configuration and probability of occurrence of different configurations of FAPbI<sub>3</sub>.
- VII.** Continuous TPT in cubic CsPbI<sub>3</sub>.
- VIII.** TPT in cubic and pseudocubic MAPbI<sub>3</sub>.
- IX.** Crystal structures of Cs<sub>0.5</sub>MA<sub>0.5</sub>PbI<sub>3</sub>, Cs<sub>0.75</sub>MA<sub>0.25</sub>PbI<sub>3</sub> and Cs<sub>0.25</sub>MA<sub>0.75</sub>PbI<sub>3</sub>.
- X.** TB parameters for Cs<sub>0.5</sub>MA<sub>0.5</sub>PbI<sub>3</sub>.

**Relaxed structures of cubic and pseudocubic FAPbI<sub>3</sub> and partial density of states of FAPbI<sub>3</sub>.**

C1N2H5Pb1I3-cubic

1.0

6.3631000 0.0000000 0.0000000

0.0000000 6.3631000 0.0000000

0.0000000 0.0000000 6.3631000

H C N I Pb

5 1 2 3 1

Direct

0.500000 0.575336 0.500000

0.683424 0.481765 0.500000

0.316573 0.481765 0.500000

0.500000 0.746958 0.500000

0.813572 0.574741 0.500000

0.704200 0.322745 0.500000

0.295799 0.322745 0.500000

0.186427 0.574741 0.500000

0.000000 0.988000 0.000000

0.500000 0.992253 0.000000

0.000000 0.487339 0.000000

0.000000 0.978411 0.500000

C1N2H5Pb1I3-pseudocubic

1.0

6.3631000 0.0000000 0.0000000

0.0000000 6.3631000 0.0000000

0.0000000 0.0000000 6.3631000

H C N I Pb

5 1 2 3 1

Direct

0.497310 0.746640 0.493147

0.501923 0.565693 0.184682

0.503670 0.316979 0.301112

0.500074 0.328511 0.709218

0.496402 0.583402 0.811370

0.499156 0.575147 0.498009

0.501777 0.476467 0.317372

0.498547 0.486826 0.683958

0.004816 0.497332 0.069536

0.068890 -0.069536 0.492561

0.497421 0.004816 -0.068890

0.000000 0.000000 0.000000



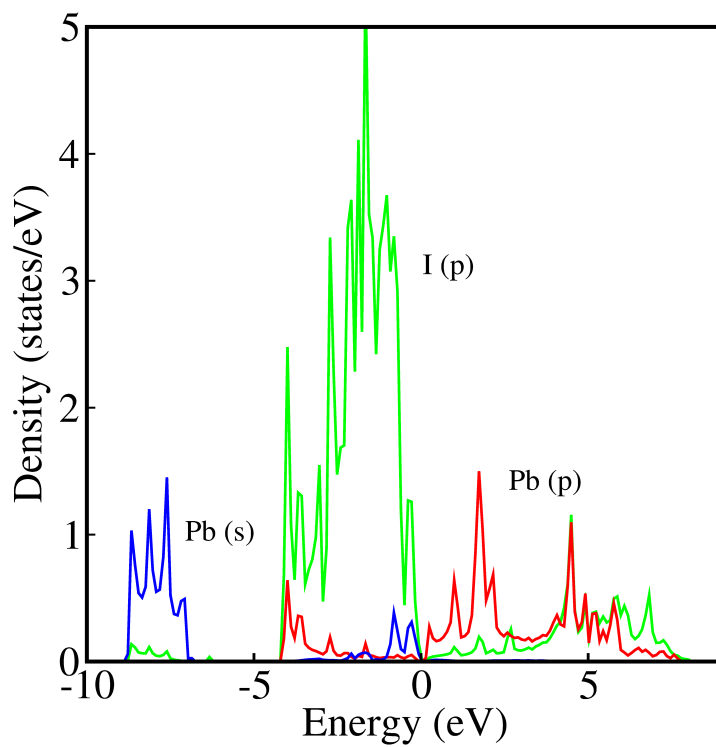

Figure S1: Partial density of states for FAPbI<sub>3</sub> showing I-p, Pb-s and Pb-p states in green, blue and red colours, respectively.

Band profile of  $\text{FAPbI}_3$  using PBE+SOC and  $\text{G}_0\text{W}_0\text{@HSE06+SOC}$  and band inversion using HSE06+SOC  $\epsilon_{xc}$  functionals.

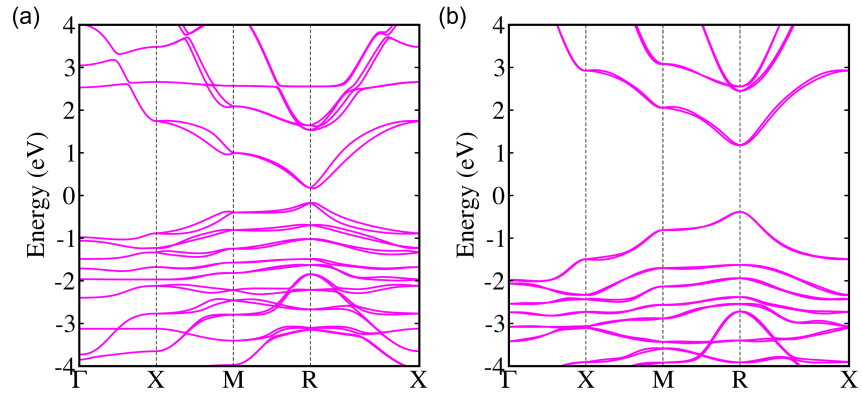

Figure S2: Band structure of  $\text{FAPbI}_3$  calculated using (a) PBE+SOC and (b)  $\text{G}_0\text{W}_0\text{@HSE06+SOC}$ .

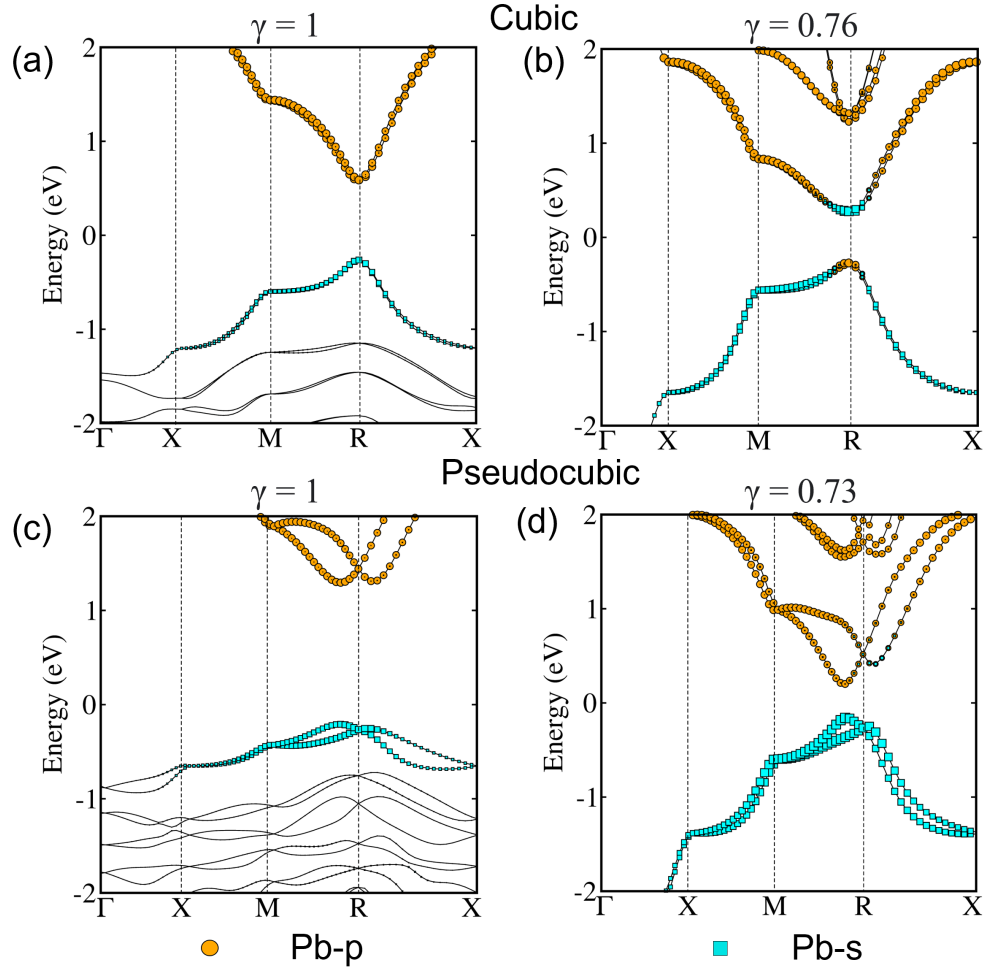

Figure S3: Orbital resolved HSE06+SOC band structure for cubic and pseudocubic FAPbI<sub>3</sub> (a), (d) without compression, and (b), (e) at critical compression  $\gamma = 0.76$ , and  $\gamma = 0.73$ , respectively.

**Structural stability of cubic FAPbI<sub>3</sub>, pseudocubic FAPbI<sub>3</sub> and mixed cation perovskites viz. Cs<sub>0.5</sub>MA<sub>0.5</sub>PbI<sub>3</sub>, Cs<sub>0.75</sub>MA<sub>0.25</sub>PbI<sub>3</sub> and Cs<sub>0.25</sub>MA<sub>0.75</sub>PbI<sub>3</sub>.**

We have checked the structural stability of cubic and pseudocubic FAPbI<sub>3</sub> along with the strained configurations using ab *initio* molecular dynamics (AIMD). For this, we have obtained the radial distribution function ( $g(r)$ ) at T = 0 K and T = 300 K. We have observed that the nature of radial distribution function remains the same at room temperature for the nearest neighbors (see Figure S4). Therefore, we validate that the configurations are structurally stable at 300 K even after undergoing compression. This makes them useful in realizing the practical applications.

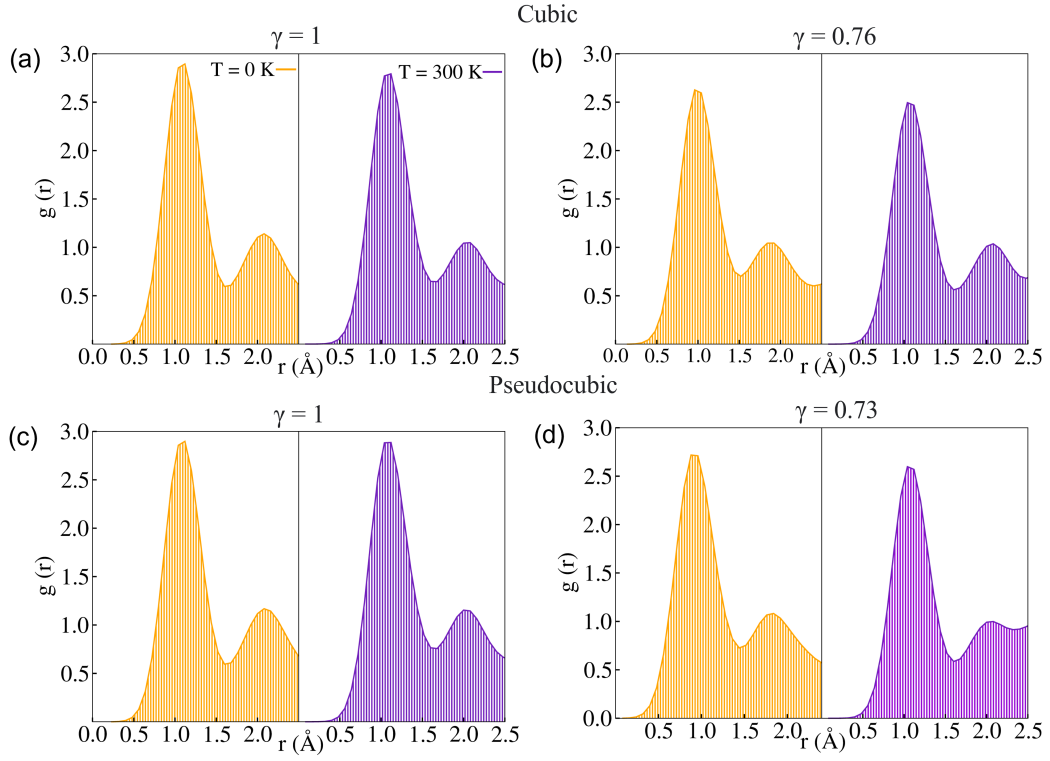

Figure S4: Radial distribution function using NVT ensemble for different phases of FAPbI<sub>3</sub> namely (a) cubic, (b) strained cubic ( $\gamma = 0.76$ ), (c) pseudocubic and (d) strained pseudocubic ( $\gamma = 0.73$ ) at T = 0 K and T = 300 K.

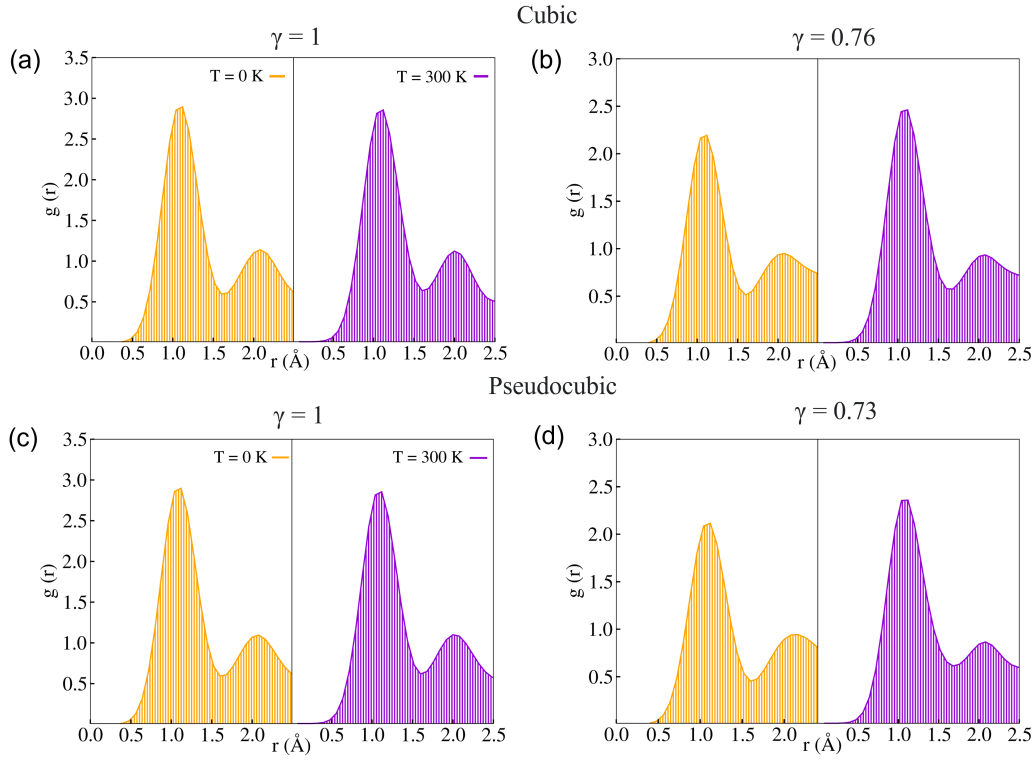

Figure S5: Radial distribution function using NPT ensemble for different phases of FAPbI<sub>3</sub> namely (a) cubic, (b) strained cubic ( $\gamma = 0.76$ ), (c) pseudocubic and (d) strained pseudocubic ( $\gamma = 0.73$ ) at T = 0 K and T = 300 K.

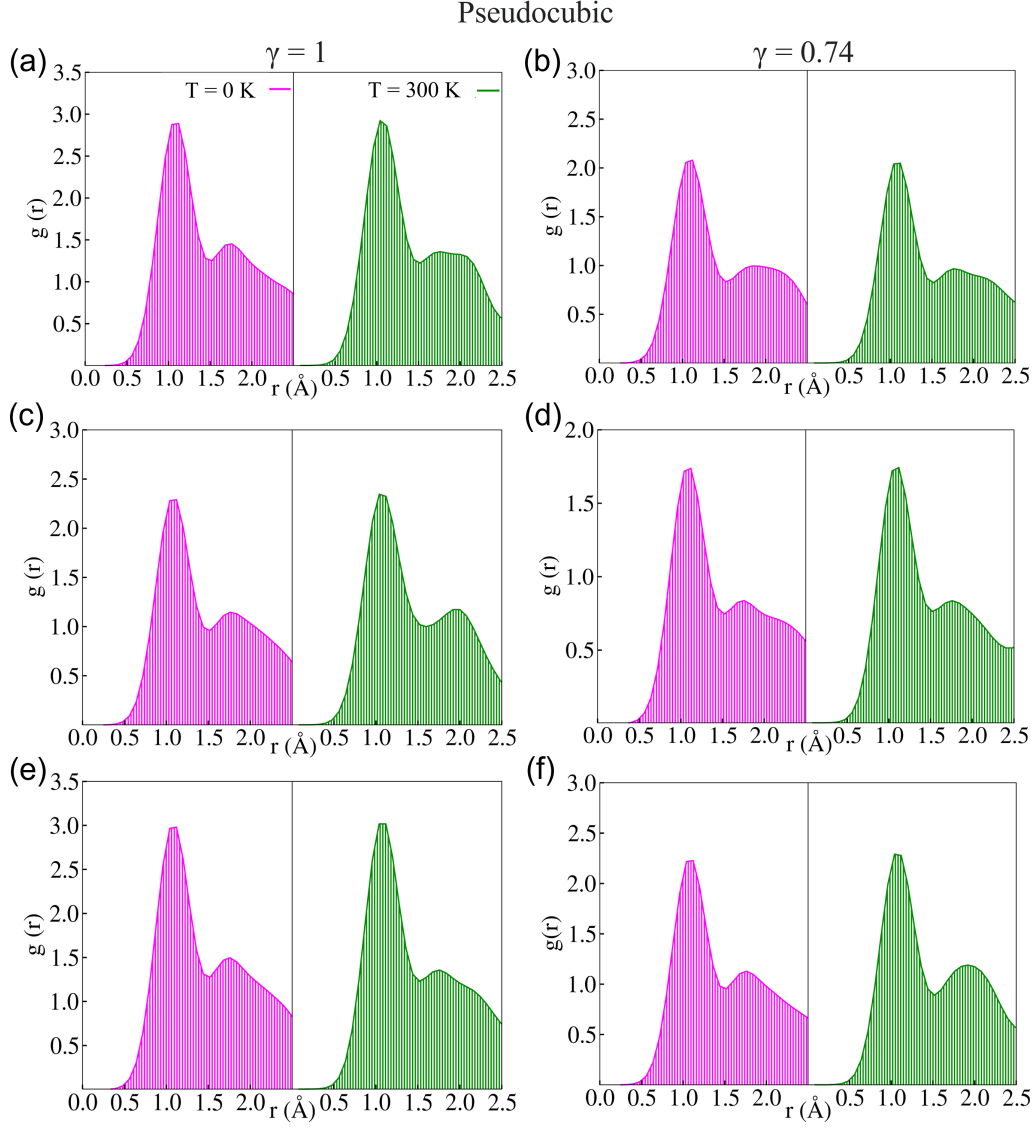

Figure S6: Radial distribution function at  $T = 0$  K and  $T = 300$  K for unstrained and strained ( $\gamma = 0.74$ ), (a), (b)  $\text{Cs}_{0.5}\text{MA}_{0.5}\text{PbI}_3$ , (c), (d)  $\text{Cs}_{0.75}\text{MA}_{0.25}\text{PbI}_3$ , (e) and (f)  $\text{Cs}_{0.25}\text{MA}_{0.75}\text{PbI}_3$ , respectively.

### Tight-Binding Model.

The individual blocks of the matrix are as follows

$$M_{4 \times 4}^{Pb-Pb} = \begin{pmatrix} \epsilon_s + g_1 & 2it_{sp\sigma}^{Pb-Pb} \text{Sin}(k_x a) & 2it_{sp\sigma}^{Pb-Pb} \text{Sin}(k_y a) & 2it_{sp\sigma}^{Pb-Pb} \text{Sin}(k_z a) \\ -2it_{sp\sigma}^{Pb-Pb} \text{Sin}(k_y a) & \epsilon_{p1} + g_2 & 0 & 0 \\ -2it_{sp\sigma}^{Pb-Pb} \text{Sin}(k_x a) & 0 & \epsilon_{p1} + g_3 & 0 \\ -2it_{sp\sigma}^{Pb-Pb} \text{Sin}(k_z a) & 0 & 0 & \epsilon_{p1} + g_4 \end{pmatrix} \quad (1)$$

$$M_{4 \times 9}^{Pb-I} = \begin{pmatrix} t_{sp\sigma}^{Pb-I} S_x & 0 & 0 & 0 & t_{sp\sigma}^{Pb-I} S_y & 0 & 0 & 0 & t_{sp\sigma}^{Pb-I} S_z \\ t_{pp\sigma}^{Pb-I} C_x & 0 & 0 & t_{pp\pi}^{Pb-I} C_y & 0 & 0 & t_{pp\pi}^{Pb-I} C_z & 0 & 0 \\ 0 & t_{pp\pi}^{Pb-I} C_x & 0 & 0 & t_{pp\pi}^{Pb-I} C_y & 0 & 0 & t_{pp\pi}^{Pb-I} C_z & 0 \\ 0 & 0 & t_{pp\pi}^{Pb-I} C_x & 0 & 0 & t_{pp\pi}^{Pb-I} C_y & 0 & 0 & t_{pp\sigma}^{Pb-I} C_z \end{pmatrix} \quad (2)$$

$$M_{9 \times 9}^{I-I} = \begin{pmatrix} \epsilon_{p2} & 0 & 0 & 0 & 0 & 0 & 0 & 0 & 0 \\ 0 & \epsilon_{p2} & 0 & 0 & 0 & 0 & 0 & 0 & 0 \\ 0 & 0 & \epsilon_{p2} & 0 & 0 & 0 & 0 & 0 & 0 \\ 0 & 0 & 0 & \epsilon_{p2} & 0 & 0 & 0 & 0 & 0 \\ 0 & 0 & 0 & 0 & \epsilon_{p2} & 0 & 0 & 0 & 0 \\ 0 & 0 & 0 & 0 & 0 & \epsilon_{p2} & 0 & 0 & 0 \\ 0 & 0 & 0 & 0 & 0 & 0 & \epsilon_{p2} & 0 & 0 \\ 0 & 0 & 0 & 0 & 0 & 0 & 0 & \epsilon_{p2} & 0 \\ 0 & 0 & 0 & 0 & 0 & 0 & 0 & 0 & \epsilon_{p2} \end{pmatrix}. \quad (3)$$

Here  $\epsilon_s$ ,  $\epsilon_{p1}$ , and  $\epsilon_{p2}$  are the onsite energies of Pb-s, Pb-p and I-p orbitals, respectively. The terms  $C_z$  and  $S_z$  are the representations for  $2\cos(k_z a/2)$  and  $2i\sin(k_z a/2)$ , and  $g_i$  ( $i = 1, 2, 3, 4$ ) are the  $\mathbf{k}$ -dependent hopping integrals arising from the Pb-Pb second neighbor interactions



given by

$$\begin{aligned}
g_1 &= 2t_{ss}^{Pb-Pb}[\cos(k_x a) + \cos(k_y a) + \cos(k_z a)], \\
g_2 &= 2t_{pp\sigma}^{Pb-Pb} \cos(k_x a) + 2t_{pp\pi}^{Pb-Pb}[\cos(k_y a) + \cos(k_z a)], \\
g_3 &= 2t_{pp\sigma}^{Pb-Pb} \cos(k_y a) + 2t_{pp\pi}^{Pb-Pb}[\cos(k_x a) + \cos(k_z a)], \\
g_4 &= 2t_{pp\sigma}^{Pb-Pb} \cos(k_z a) + 2t_{pp\pi}^{Pb-Pb}[\cos(k_x a) + \cos(k_y a)].
\end{aligned} \tag{4}$$

### TB bands fitted with DFT bands.

The TB Hamiltonian is diagonalized and the resulted bands are fitted with that of DFT. The TB bands are plotted in brown while DFT bands are in blue. We find an excellent agreement between the TB and DFT bands (see FIG. S7).

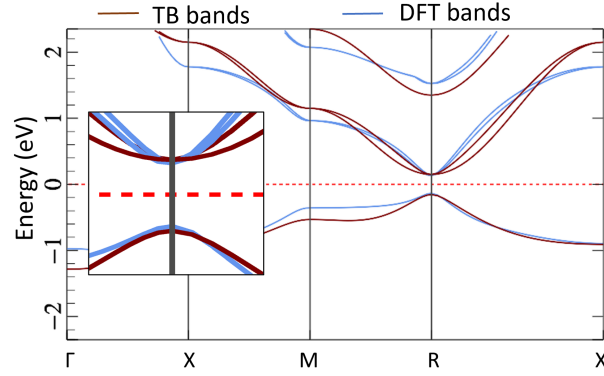

Figure S7: TB bands (brown) fitted with DFT bands (blue).

### Surface states of FAPbI<sub>3</sub> in a different configuration and probability of occurrence of different configurations of FAPbI<sub>3</sub>.

We have studied the effect on strain on two different orientations of FA i.e.,  $n = 2$  and  $n = 4$  (see Figure S9 for  $n = 2, 4$ ). In both the orientations FA is perpendicular to each other and both show topological phase transition at the critical value of strain (see Figure S8). For MA a different orientation has already been studied in ref.<sup>1</sup>

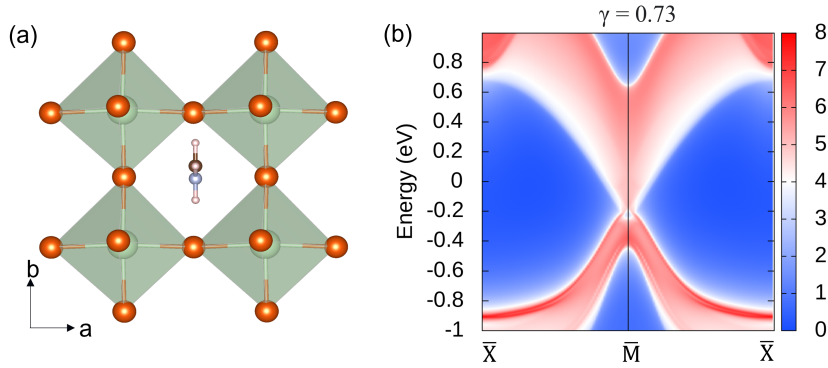

Figure S8: (a) Crystal structure of FAPbI<sub>3</sub> showing a different orientation of FA cation and (b) topological surface states at critical strain value.

However, many different orientations of these organic molecules are indeed possible. Therefore, in order to ensure the validity of our above analysis, we have estimated the probability of occurrence of different possible pseudocubic configurations at  $T=300$  K. Here, we assume that a total of  $N$  different configurations are possible out of which  $N_n$  is the number of a given type (here  $n = 4$ ) and its probability of occurrence is given as per Fermi-Dirac statistics as follows [see theoretical derivations in <sup>2,3</sup>]:

$$\frac{N_n}{N} = \frac{\exp(-\beta\Delta G_n)}{1 + \sum_m \exp(-\beta\Delta G_m)} \quad (5)$$

Here,  $\frac{N_n}{N}$  is the probability of occurrence and  $\Delta G$  is the Gibbs free energy of formation of the type- $n$  configuration. As the range of  $\frac{N_n}{N} \times 100$  is significantly large, we have taken the logarithm of the above equation (see Figure S9). The maximum possible value of y-axis is

$\sim 2$ , when  $N_n = N$ , i.e., type- $n$  is the most dominant configuration. Here, we can see that the concentration of different configurations are comparable.

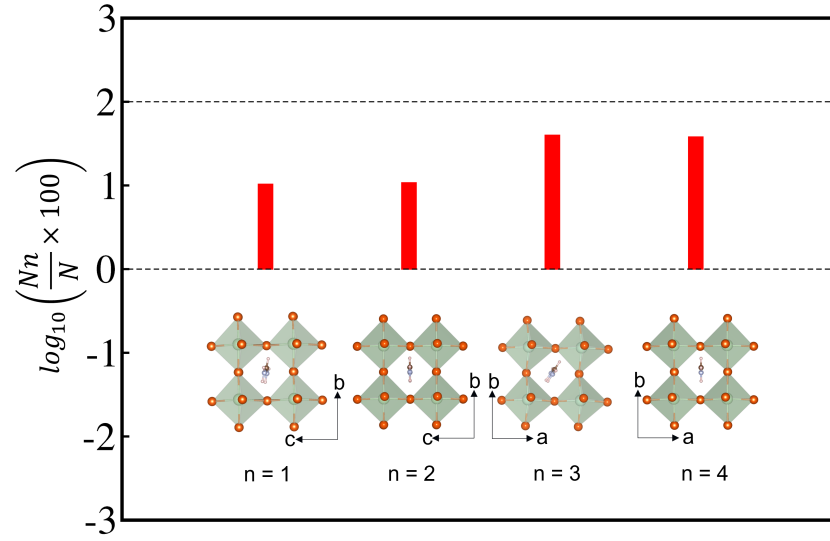

Figure S9: Logarithm of probability of occurrence of different configurations at  $T = 300$  K. Orientation of FA is different in all the configurations.

# Continuous TPT in cubic CsPbI<sub>3</sub>.

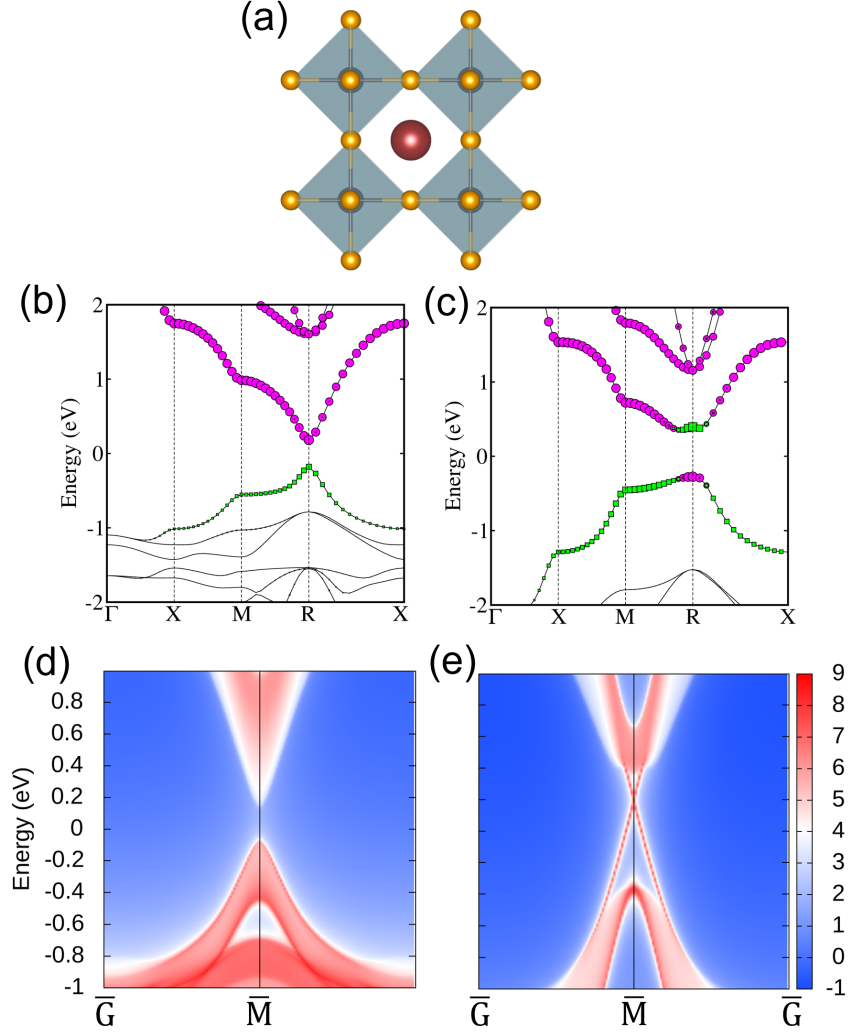

Figure S10: (a) Crystal structure of cubic CsPbI<sub>3</sub>. Bulk band structure (b) without compression with Pb-*p* (magenta) contribution at CBM and Pb-*s* (green) contribution at VBM, and (c) with compression  $\gamma = 0.76$ , showing band inversion at R point. Surface band structure (d) without, and (e) with compression, showing a continuous transition from normal to topological state.

# TPT in cubic and pseudocubic MAPbI<sub>3</sub>.

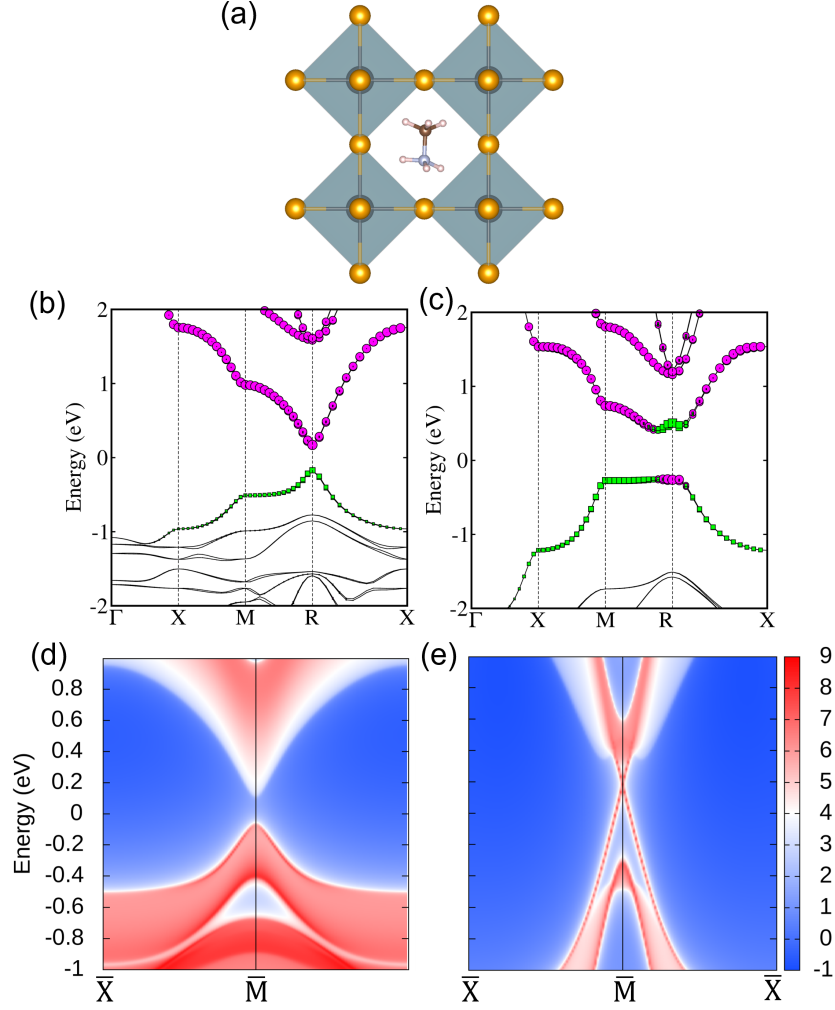

Figure S11: (a) Crystal structure of cubic MAPbI<sub>3</sub>. Bulk band structure (b) without compression with Pb-*p* (magenta) contribution at CBM and Pb-*s* (green) contribution at VBM, and (c) with compression  $\gamma=0.73$ , showing band inversion at R point. Surface band structure (d) without, and (e) with compression  $\gamma=0.73$ , showing a continuous transition from normal to topological state.

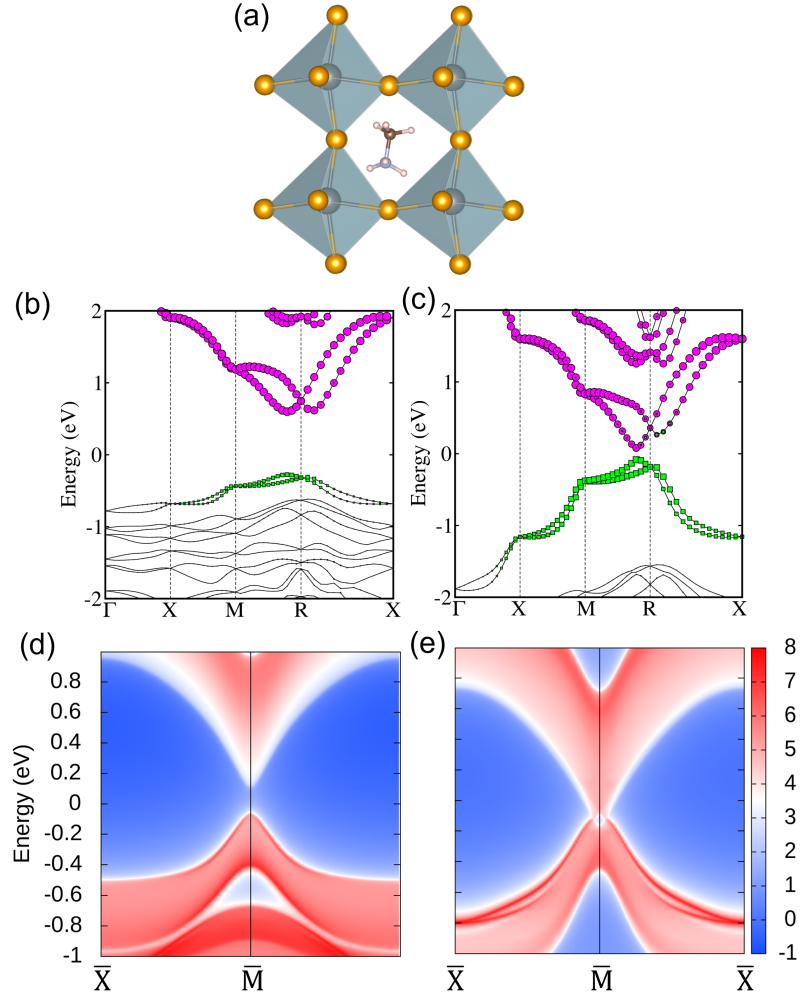

Figure S12: (a) Crystal structure of pseudocubic MAPbI<sub>3</sub>. Bulk band structure (b) without compression with Pb-*p* contribution at CBM and Pb-*s* contribution at VBM, and (c) with compression  $\gamma=0.73$ , showing band inversion at R point. Surface band structure (d) without, and (e) with compression  $\gamma=0.73$ , showing a discontinuous transition from normal to topological state.

Crystal structures of  $\text{Cs}_{0.5}\text{MA}_{0.5}\text{PbI}_3$ ,  $\text{Cs}_{0.75}\text{MA}_{0.25}\text{PbI}_3$  and  $\text{Cs}_{0.25}\text{MA}_{0.75}\text{PbI}_3$ .

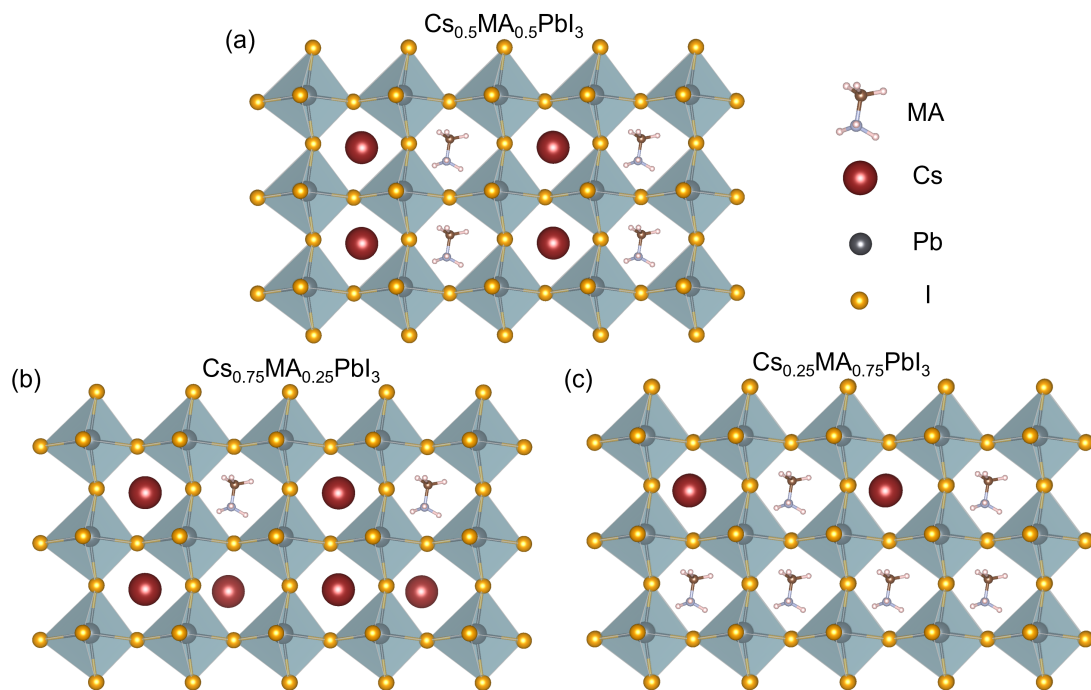

Figure S13: Crystal structure of (a)  $\text{Cs}_{0.75}\text{MA}_{0.5}\text{PbI}_3$ , (b)  $\text{Cs}_{0.5}\text{MA}_{0.5}\text{PbI}_3$  and (c)  $\text{Cs}_{0.25}\text{MA}_{0.75}\text{PbI}_3$ .



TB parameters for  $\text{Cs}_{0.5}\text{MA}_{0.5}\text{PbI}_3$ .

**Table S1:** Interaction parameters and SOC strength for  $\text{Cs}_{0.5}\text{MA}_{0.5}\text{PbI}_3$  from thirteen band hamiltonian at zero and critical compression strength in units of eV.

| Type            | $E_{Pb-s}$ | $E_{Pb-p}$ | $E_{I-p}$ | $t_{sp\sigma}^{Pb-I}$ | $t_{pp\sigma}^{Pb-I}$ | $t_{pp\pi}^{Pb-I}$ | $t_{ss\sigma}^{Pb-Pb}$ | $t_{sp\sigma}^{Pb-Pb}$ | $t_{pp\sigma}^{Pb-Pb}$ | $t_{pp\pi}^{Pb-Pb}$ | $\lambda$ |
|-----------------|------------|------------|-----------|-----------------------|-----------------------|--------------------|------------------------|------------------------|------------------------|---------------------|-----------|
| $\gamma = 1$    | -7         | 2          | -1.5      | 0.8                   | -1                    | 1                  | -0.25                  | 0.3                    | 0.7                    | 0.01                | 0.5       |
| $\gamma = 0.74$ | -7         | 2.5        | -2        | 1                     | -1.2                  | 1.5                | -0.27                  | 0.4                    | 1.15                   | 0.02                | 0.5       |

## References

- (1) Kore, A.; Kashikar, R.; Gupta, M.; Singh, P.; Nanda, B. Pressure and inversion symmetry breaking field-driven first-order phase transition and formation of Dirac circle in perovskites. *Phys. Rev. B* **2020**, *102*, 035116.
- (2) Bhumla, P.; Kumar, M.; Bhattacharya, S. Theoretical insights into C–H bond activation of methane by transition metal clusters: the role of anharmonic effects. *Nanoscale Adv.* **2021**, *3*, 575–583.
- (3) Bhattacharya, S.; Berger, D.; Reuter, K.; Ghiringhelli, L. M.; Levchenko, S. V. Theoretical evidence for unexpected O-rich phases at corners of MgO surfaces. *Phys. Rev. Mater.* **2017**, *1*, 071601.
